# Supplementary material
Source: publisher figshare collection journal article supplement (https://acs.figshare.com/ndownloader/files/7880743)
Supplement: Supplementary file 1 [file 7880743]

Supporting Information

# Tuning the Work Function of Printed Polymer Electrodes by Introducing a Fluorinated Polymer to Enhance the Operational Stability in Bottom-Contact Organic Field-Effect Transistors

*Se Hyun Kim,<sup>a,†</sup> Jiye Kim,<sup>b,†</sup> Sooji Nam,<sup>c</sup> Hwa Sung Lee,<sup>\*d</sup> Seung Woo Lee,<sup>\*a</sup> and Jaeyoung Jang<sup>\*e</sup>*

<sup>a</sup>School of Chemical Engineering, Yeungnam University, Gyeongsan, North Gyeongsang 38541, South Korea

<sup>b</sup>Department of Chemical Engineering, Pohang University of Science and Technology, Pohang, 37673, South Korea

<sup>c</sup>Smart I/O Control Device Research Section, Electronics and Telecommunications Research Institute, Daejeon, 305-700, Republic of Korea

<sup>d</sup>Department of Chemical & Biological Engineering, Hanbat National University, Daejeon 305-719, Republic of Korea

<sup>e</sup>Department of Energy Engineering, Hanyang University, Seoul, 133-791, Republic of Korea

Corresponding author information

\*E-mail: jyjang15@hanyang.ac.kr, Fax: +82-2-2291-5982, Tel: +82-2-2220-2334 (J. Jang)

\*E-mail: leesw1212@ynu.ac.kr (S. W. Lee)

\*E-mail: hlee@hanbat.ac.kr (H. S. Lee)

Nafion ratio:

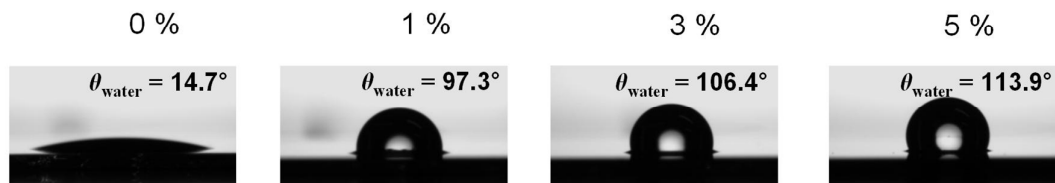

**Figure S1.** The images of water contact angle  $\theta_{\text{water}}$  for the neat PEDOT:PSS (i.e. 0% of Nafion) film and PEDOT:PSS/Nafion films with different Nafion ratios.

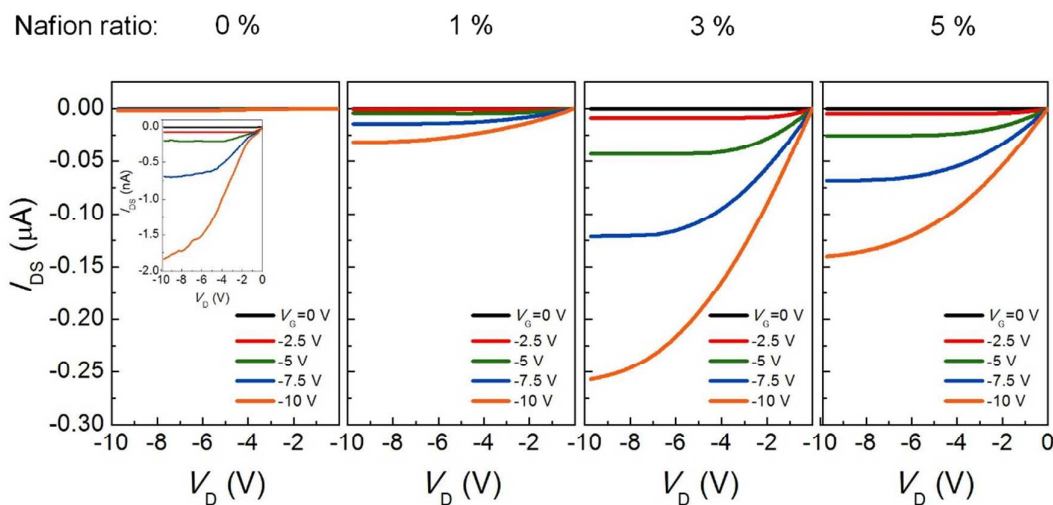

**Figure S2.** The typical drain current-drain voltage ( $I_{\text{D}}-V_{\text{D}}$ ) output characteristics of the pentacene based bottom-contact OFETs with the neat PEDOT:PSS electrodes and the PEDOT:PSS/Nafion electrodes.
